# Supplementary material
Source: PubMed Central journal article supplement (PMC3584885)
Supplement: IAI.01067-12_zii999090024so1.pdf [file IAI.01067-12_zii999090024so1.pdf]

| Cytokine/<br>Chemokine<br>(pg/mL) | Serum       |              |               |                          |
|-----------------------------------|-------------|--------------|---------------|--------------------------|
|                                   | 24 h        |              |               |                          |
|                                   | WT          | $\Delta lpp$ | $\Delta msbB$ | $\Delta lpp/\Delta msbB$ |
| TNF- $\alpha$                     | 0.48±1.06   | 0            | 0.34±0.68     | 3.06±3.61                |
| IFN- $\gamma$                     | 0           | 0            | 0             | 0                        |
| G-CSF                             | 5.69±4.46   | 27±26        | 15±11.20      | 80±59                    |
| GM-CSF                            | 0           | 0            | 6.37±14       | 2.02±4.51                |
| M-CSF                             | 0.31±0.70   | 0            | 0             | 0.14±0.32                |
| IL-1 $\alpha$                     | 1.68±2.37   | 8.41±8.61    | 30±27         | 11±6.75                  |
| IL-1 $\beta$                      | 0           | 5.17±7.64    | 3.86±4.32     | 5.22±6.31                |
| IL-2                              | 0.97±0.62   | 0.91±1.16    | 1.31±0.71     | 0.82±0.53                |
| IL-3                              | 0.89±0.61   | 0.87±0.63    | 0.73±0.70     | 0.58±0.60                |
| IL-4                              | 0           | 0            | 0.11±0.25     | 0.75±1.31                |
| IL-5                              | 1.56±1.49   | 2.50±2.59    | 0.69±1.53     | 1.36±3.04                |
| IL-6                              | 1.12±2.00   | 5.73±10.42   | 0.58±0.82     | 7.37±14                  |
| IL-7                              | 2.92±3.92   | 0.71±1.49    | 1.51±1.83     | 1.37±1.76                |
| IL-9                              | 23±20       | 83±91        | 96±81         | 45±52                    |
| IL-10                             | 4.28±4.19   | 6.87±6.13    | 2.01±1.77     | 2.98±1.94                |
| IL-12(p40)                        | 0           | 7.80±17.43   | 0             | 0.04±0.10                |
| IL-12(p70)                        | 3.14±2.95   | 2.28±5.09    | 2.06±4.60     | 2.69±3.73                |
| IL-13                             | 0.08±0.17   | 5.49±6.44    | 1.82±4.07     | 0                        |
| IL-15                             | 2.52±1.98   | 2.77±3.81    | 6.76±7.93     | 3.18±5.66                |
| IL-17                             | 2.06±4.62   | 0            | 0.39±0.83     | 1.25±1.98                |
| IP-10                             | 43±25       | 24±24        | 75±38         | 73±29                    |
| Eotaxin                           | 318±61      | 448±77       | 309±122       | 328±159                  |
| KC                                | 8.51±5.69   | 17±11        | 10±8          | 60±75                    |
| LIF                               | 0.94±2.11   | 0            | 0             | 1.25±2.80                |
| LIX                               | 1778±1532   | 2546±1104    | 1674±1531     | 3194±1689                |
| MCP-1                             | 36.41±30.89 | 21±7         | 10±9          | 26±15                    |
| MIG                               | 166±75      | 200±114      | 180±42        | 246±170                  |
| MIP1- $\alpha$                    | 0           | 0            | 0             | 22±30                    |
| MIP1- $\beta$                     | 0           | 0            | 1.28±2.85     | 11±25                    |
| MIP-2                             | 20±27       | 11±24        | 47±67         | 19±18                    |
| RANTES                            | 0.44±0.99   | 1.03±1.18    | 0.70±1.13     | 2.93±3.41                |
| VEGF                              | 0           | 0            | 0.54±0.56     | 0.58±0.95                |

Table S1 Continued

| Cytokine/<br>Chemokine<br>(pg/mL) | Serum           |                 |                 |                          |
|-----------------------------------|-----------------|-----------------|-----------------|--------------------------|
|                                   | 48 h            |                 |                 |                          |
|                                   | WT              | $\Delta lpp$    | $\Delta msbB$   | $\Delta lpp/\Delta msbB$ |
| TNF- $\alpha$                     | 2.70 $\pm$ 4.24 | 1.50 $\pm$ 0.98 | 3.76 $\pm$ 1.67 | 4.33 $\pm$ 1.73          |
| IFN- $\gamma$                     | 0               | 0               | 0               | 0                        |
| G-CSF                             | 221 $\pm$ 242   | 45 $\pm$ 41     | 906 $\pm$ 1882  | 170 $\pm$ 181            |
| GM-CSF                            | 9.05 $\pm$ 20   | 15 $\pm$ 22     | 8.80 $\pm$ 10   | 30 $\pm$ 22              |
| M-CSF                             | 1.41 $\pm$ 3.16 | 0.04 $\pm$ 0.09 | 2.10 $\pm$ 2.93 | 6.71 $\pm$ 5.08          |
| IL-1 $\alpha$                     | 19.32 $\pm$ 28  | 23 $\pm$ 10     | 26 $\pm$ 22     | 53 $\pm$ 37              |
| IL-1 $\beta$                      | 1.44 $\pm$ 3.23 | 15 $\pm$ 12     | 6.22 $\pm$ 8.15 | 11 $\pm$ 9.24            |
| IL-2                              | 0.98 $\pm$ 0.74 | 1.53 $\pm$ 1.02 | 1.11 $\pm$ 0.49 | 0.97 $\pm$ 0.28          |
| IL-3                              | 2.64 $\pm$ 3.72 | 3.38 $\pm$ 2.12 | 3.33 $\pm$ 5.07 | 4.44 $\pm$ 3.66          |
| IL-4                              | 0.28 $\pm$ 0.64 | 2.61 $\pm$ 5.06 | 0.98 $\pm$ 0.57 | 1.49 $\pm$ 0.46          |
| IL-5                              | 2.23 $\pm$ 3.12 | 4.40 $\pm$ 5.15 | 0               | 2.74 $\pm$ 6.14          |
| IL-6                              | 586 $\pm$ 566   | 45 $\pm$ 53     | 253 $\pm$ 563   | 977 $\pm$ 1166           |
| IL-7                              | 0.89 $\pm$ 0.89 | 3.86 $\pm$ 2.61 | 0               | 0                        |
| IL-9                              | 175 $\pm$ 118   | 142 $\pm$ 119   | 110 $\pm$ 93    | 152 $\pm$ 94             |
| IL-10                             | 10 $\pm$ 13     | 24 $\pm$ 40     | 9.80 $\pm$ 6.94 | 14 $\pm$ 10              |
| IL-12(p40)                        | 0               | 7.34 $\pm$ 13   | 0               | 0                        |
| IL-12(p70)                        | 49 $\pm$ 27     | 6.88 $\pm$ 6.30 | 10 $\pm$ 23     | 82 $\pm$ 66              |
| IL-13                             | 6.10 $\pm$ 10   | 20 $\pm$ 30     | 15 $\pm$ 33     | 10 $\pm$ 19              |
| IL-15                             | 6.54 $\pm$ 10   | 16 $\pm$ 17     | 6.96 $\pm$ 15   | 17 $\pm$ 22              |
| IL-17                             | 1.68 $\pm$ 3.75 | 3.13 $\pm$ 3.89 | 4.69 $\pm$ 3.36 | 27 $\pm$ 23              |
| IP-10                             | 226 $\pm$ 373   | 105 $\pm$ 63    | 333 $\pm$ 470   | 454 $\pm$ 338            |
| Eotaxin                           | 658 $\pm$ 607   | 309 $\pm$ 284   | 684 $\pm$ 762   | 605 $\pm$ 52             |
| KC                                | 320 $\pm$ 347   | 39 $\pm$ 48     | 303 $\pm$ 618   | 628 $\pm$ 871            |
| LIF                               | 1.96 $\pm$ 4.38 | 1.53 $\pm$ 2.12 | 4.08 $\pm$ 6.26 | 4.06 $\pm$ 3.22          |
| LIX                               | 3541 $\pm$ 3182 | 3824 $\pm$ 3657 | 3991 $\pm$ 3152 | 3627 $\pm$ 463           |
| MCP-1                             | 50 $\pm$ 36     | 43 $\pm$ 34     | 87 $\pm$ 112    | 416 $\pm$ 362            |
| MIG                               | 686 $\pm$ 495   | 296 $\pm$ 308   | 325 $\pm$ 258   | 743 $\pm$ 443            |
| MIP1- $\alpha$                    | 32 $\pm$ 44     | 24 $\pm$ 34     | 19 $\pm$ 43     | 47 $\pm$ 55              |
| MIP1- $\beta$                     | 32 $\pm$ 29     | 9.29 $\pm$ 13   | 30 $\pm$ 33     | 21 $\pm$ 25              |
| MIP-2                             | 41 $\pm$ 16     | 34 $\pm$ 29     | 41 $\pm$ 28     | 40 $\pm$ 8.09            |
| RANTES                            | 12 $\pm$ 13     | 4.77 $\pm$ 2.60 | 4.54 $\pm$ 2.65 | 10 $\pm$ 5.24            |
| VEGF                              | 0.73 $\pm$ 1.63 | 0.81 $\pm$ 1.05 | 1.68 $\pm$ 2.00 | 3.85 $\pm$ 2.33          |

Table S1 Continued

| Cytokine/<br>Chemokine<br>(pg/mL) | Serum               |                     |                     |                     |
|-----------------------------------|---------------------|---------------------|---------------------|---------------------|
|                                   | 72 h                |                     |                     |                     |
|                                   | WT                  | <i>Δlpp</i>         | <i>ΔmsbB</i>        | <i>Δlpp/ΔmsbB</i>   |
| TNF- $\alpha$                     | 49 $\pm$ 45         | 48 $\pm$ 42         | 15 $\pm$ 16         | 7.07 $\pm$ 7.53     |
| IFN- $\gamma$                     | 3988 $\pm$ 5574     | 691 $\pm$ 821       | 1198 $\pm$ 2071     | 6.10 $\pm$ 14*      |
| G-CSF                             | 39742 $\pm$ 46643   | 46571 $\pm$ 20309   | 28388 $\pm$ 33309   | 19960 $\pm$ 25655   |
| GM-CSF                            | 82 $\pm$ 60         | 75 $\pm$ 28         | 38 $\pm$ 25         | 14 $\pm$ 18*        |
| M-CSF                             | 28 $\pm$ 36         | 17 $\pm$ 4.57       | 10 $\pm$ 16         | 2.36 $\pm$ 2.40     |
| IL-1 $\alpha$                     | 137 $\pm$ 136       | 185 $\pm$ 163       | 56 $\pm$ 58         | 26 $\pm$ 18         |
| IL-1 $\beta$                      | 268 $\pm$ 400       | 253 $\pm$ 252       | 13 $\pm$ 11         | 25 $\pm$ 30         |
| IL-2                              | 2.09 $\pm$ 1.11     | 1.63 $\pm$ 0.50     | 1.00 $\pm$ 0.52     | 0.77 $\pm$ 0.29     |
| IL-3                              | 12 $\pm$ 13         | 9.46 $\pm$ 9.62     | 3.56 $\pm$ 4.25     | 1.29 $\pm$ 2.31     |
| IL-4                              | 3.42 $\pm$ 2.75     | 2.14 $\pm$ 0.94     | 1.74 $\pm$ 0.98     | 1.09 $\pm$ 0.48     |
| IL-5                              | 17 $\pm$ 19         | 13.90 $\pm$ 14      | 5.69 $\pm$ 13       | 0                   |
| IL-6                              | 257582 $\pm$ 168448 | 273768 $\pm$ 152137 | 136913 $\pm$ 187041 | 136827 $\pm$ 187119 |
| IL-7                              | 13 $\pm$ 28         | 2.60 $\pm$ 5.81     | 0                   | 0                   |
| IL-9                              | 268 $\pm$ 171       | 391 $\pm$ 104       | 271 $\pm$ 362       | 278 $\pm$ 272       |
| IL-10                             | 74 $\pm$ 69         | 39 $\pm$ 25         | 24 $\pm$ 21         | 3.69 $\pm$ 6*       |
| IL-12(p40)                        | 0                   | 2.72 $\pm$ 6.08     | 0                   | 0.00                |
| IL-12(p70)                        | 239 $\pm$ 192       | 269 $\pm$ 1278      | 107 $\pm$ 147       | 87 $\pm$ 119        |
| IL-13                             | 251 $\pm$ 268       | 165 $\pm$ 99        | 77 $\pm$ 75         | 31 $\pm$ 46*        |
| IL-15                             | 142 $\pm$ 145       | 81 $\pm$ 75         | 66 $\pm$ 77         | 6.69 $\pm$ 15       |
| IL-17                             | 116 $\pm$ 108       | 185 $\pm$ 257       | 43 $\pm$ 54         | 33 $\pm$ 41         |
| IP-10                             | 1417 $\pm$ 693      | 1477 $\pm$ 301      | 853 $\pm$ 746       | 503 $\pm$ 441       |
| Eotaxin                           | 932 $\pm$ 618       | 913 $\pm$ 345       | 593 $\pm$ 436       | 407 $\pm$ 163       |
| KC                                | 5887 $\pm$ 4999     | 4663 $\pm$ 1301     | 2310 $\pm$ 3920     | 696 $\pm$ 1012*     |
| LIF                               | 62 $\pm$ 55         | 119 $\pm$ 129       | 27.77 $\pm$ 33      | 34 $\pm$ 47         |
| LIX                               | 2859 $\pm$ 918      | 2777 $\pm$ 1308     | 2221 $\pm$ 582      | 2146 $\pm$ 11423    |
| MCP-1                             | 1750 $\pm$ 1576     | 1567 $\pm$ 991      | 602 $\pm$ 941       | 86 $\pm$ 73*        |
| MIG                               | 8555 $\pm$ 8189     | 5994 $\pm$ 2476     | 3857 $\pm$ 6053     | 761 $\pm$ 822*      |
| MIP1- $\alpha$                    | 220 $\pm$ 189       | 264 $\pm$ 159       | 87 $\pm$ 123        | 83 $\pm$ 120        |
| MIP1- $\beta$                     | 345 $\pm$ 321       | 352 $\pm$ 215       | 140 $\pm$ 164       | 53 $\pm$ 74*        |
| MIP-2                             | 3097 $\pm$ 3227     | 171 $\pm$ 111*      | 754 $\pm$ 1608      | 26 $\pm$ 15*        |
| RANTES                            | 81 $\pm$ 122        | 48 $\pm$ 34         | 15 $\pm$ 11         | 7.93 $\pm$ 5.51     |
| VEGF                              | 20 $\pm$ 19         | 27 $\pm$ 26         | 11 $\pm$ 15         | 2.33 $\pm$ 1.96     |

Table S1 Continued

| Spleen                            |                   |                   |                 |                   |
|-----------------------------------|-------------------|-------------------|-----------------|-------------------|
| Cytokine/<br>Chemokine<br>(pg/mL) | 72 h              |                   |                 |                   |
|                                   | WT                | <i>Δlpp</i>       | <i>ΔmsbB</i>    | <i>Δlpp/ΔmsbB</i> |
| TNF- $\alpha$                     | 100 $\pm$ 33      | 70 $\pm$ 21       | 53 $\pm$ 17*    | 57 $\pm$ 19       |
| IFN- $\gamma$                     | 11765 $\pm$ 18388 | 1174 $\pm$ 972    | 2216 $\pm$ 3766 | 102 $\pm$ 41      |
| G-CSF                             | 23477 $\pm$ 36137 | 13535 $\pm$ 13045 | 4314 $\pm$ 6284 | 367 $\pm$ 288     |
| GM-CSF                            | 292 $\pm$ 101     | 222 $\pm$ 82      | 137 $\pm$ 80*   | 106 $\pm$ 11*     |
| M-CSF                             | 682 $\pm$ 354     | 539 $\pm$ 301     | 538 $\pm$ 213   | 316 $\pm$ 98      |
| IL-1 $\alpha$                     | 541 $\pm$ 307     | 456 $\pm$ 128     | 381 $\pm$ 370   | 145 $\pm$ 13      |
| IL-1 $\beta$                      | 711 $\pm$ 531     | 591 $\pm$ 433     | 242 $\pm$ 197   | 158 $\pm$ 25      |
| IL-2                              | 57 $\pm$ 6.71     | 46 $\pm$ 7.20     | 46 $\pm$ 12     | 54 $\pm$ 15       |
| IL-3                              | 69 $\pm$ 7.68     | 68 $\pm$ 22       | 41 $\pm$ 12     | 40 $\pm$ 13*      |
| IL-4                              | 15 $\pm$ 7.26     | 12 $\pm$ 8.44     | 11 $\pm$ 11     | 21 $\pm$ 14       |
| IL-5                              | 76 $\pm$ 17       | 71 $\pm$ 14       | 50 $\pm$ 26     | 30 $\pm$ 18*      |
| IL-6                              | 4042 $\pm$ 4768   | 1489 $\pm$ 650    | 678 $\pm$ 721   | 167 $\pm$ 77      |
| IL-7                              | 49 $\pm$ 13       | 43 $\pm$ 21       | 40 $\pm$ 12     | 40 $\pm$ 14       |
| IL-9                              | 178 $\pm$ 27      | 271 $\pm$ 173     | 151 $\pm$ 63    | 91 $\pm$ 64       |
| IL-10                             | 95 $\pm$ 26       | 92 $\pm$ 29       | 77 $\pm$ 24     | 74 $\pm$ 21       |
| IL-12(p40)                        | 31 $\pm$ 17       | 36 $\pm$ 28       | 29 $\pm$ 26     | 16 $\pm$ 12       |
| IL-12(p70)                        | 22 $\pm$ 12       | 15 $\pm$ 6.94     | 3 $\pm$ 7*      | 0*                |
| IL-13                             | 205 $\pm$ 61      | 166 $\pm$ 26      | 84 $\pm$ 49*    | 78 $\pm$ 52*      |
| IL-15                             | 85 $\pm$ 31       | 75 $\pm$ 20       | 40 $\pm$ 18*    | 26 $\pm$ 25*      |
| IL-17                             | 44 $\pm$ 46       | 18 $\pm$ 12       | 7.06 $\pm$ 16   | 0                 |
| IP-10                             | 4929 $\pm$ 2267   | 4283 $\pm$ 3339   | 2369 $\pm$ 1474 | 1529 $\pm$ 294    |
| Eotaxin                           | 1136 $\pm$ 635    | 827 $\pm$ 361     | 704 $\pm$ 265   | 538 $\pm$ 217     |
| KC                                | 7850 $\pm$ 5539   | 6543 $\pm$ 3929   | 4466 $\pm$ 5157 | 1175 $\pm$ 1013   |
| LIF                               | 245 $\pm$ 228     | 108 $\pm$ 61      | 66 $\pm$ 117    | 19 $\pm$ 20       |
| LIX                               | 982 $\pm$ 297     | 1034 $\pm$ 522    | 959 $\pm$ 111   | 932 $\pm$ 320     |
| MCP-1                             | 2057 $\pm$ 3128   | 609 $\pm$ 363     | 489 $\pm$ 731   | 69 $\pm$ 21       |
| MIG                               | 10674 $\pm$ 2156  | 10261 $\pm$ 2229  | 7215 $\pm$ 2431 | 6728 $\pm$ 758*   |
| MIP1- $\alpha$                    | 444 $\pm$ 272     | 239 $\pm$ 163     | 198 $\pm$ 139   | 149 $\pm$ 71      |
| MIP1- $\beta$                     | 353 $\pm$ 107     | 229 $\pm$ 58      | 234 $\pm$ 50    | 237 $\pm$ 115     |
| MIP-2                             | 1169 $\pm$ 1439   | 411 $\pm$ 452     | 767 $\pm$ 1566  | 64 $\pm$ 18       |
| RANTES                            | 431 $\pm$ 247     | 277 $\pm$ 111     | 355 $\pm$ 142   | 502 $\pm$ 327     |
| VEGF                              | 346 $\pm$ 238     | 318 $\pm$ 361     | 246 $\pm$ 370   | 131 $\pm$ 69      |

\* Denotes statistical significant differences compared to the WT bacteria-infected group by using one-way ANOVA with Bonferroni correction.

**Table S2: Cytokine/Chemokine Production in Mouse Serum and Spleen during Bubonic Plague**

| Cytokine/<br>Chemokine<br>(pg/mL) | Serum             |                   |                   |                          |
|-----------------------------------|-------------------|-------------------|-------------------|--------------------------|
|                                   | 48 h              |                   |                   |                          |
|                                   | WT                | $\Delta lpp$      | $\Delta msbB$     | $\Delta lpp/\Delta msbB$ |
| TNF- $\alpha$                     | 4.92 $\pm$ 7.28   | 2.62 $\pm$ 2.73   | 2.55 $\pm$ 2.23   | 3.64 $\pm$ 8.05          |
| IFN- $\gamma$                     | 62 $\pm$ 109      | 0                 | 0                 | 23.51 $\pm$ 53           |
| G-CSF                             | 52831 $\pm$ 29432 | 44784 $\pm$ 37543 | 32292 $\pm$ 36500 | 43986 $\pm$ 38617        |
| GM-CSF                            | 19 $\pm$ 26       | 0                 | 21 $\pm$ 35       | 14.01 $\pm$ 21           |
| M-CSF                             | 3.18 $\pm$ 5.25   | 0                 | 1.51 $\pm$ 2.18   | 1.91 $\pm$ 3.90          |
| IL-1 $\alpha$                     | 63 $\pm$ 25       | 26 $\pm$ 9.42     | 36 $\pm$ 21       | 43 $\pm$ 10              |
| IL-1 $\beta$                      | 20 $\pm$ 17       | 12 $\pm$ 9.02     | 11 $\pm$ 5.57     | 6.26 $\pm$ 7.09          |
| IL-2                              | 2.14 $\pm$ 1.91   | 2.01 $\pm$ 0.88   | 1.33 $\pm$ 0.88   | 1.76 $\pm$ 0.61          |
| IL-3                              | 2.12 $\pm$ 0.91   | 1.90 $\pm$ 0.60   | 2.36 $\pm$ 1.69   | 2.03 $\pm$ 1.29          |
| IL-4                              | 0.21 $\pm$ 0.48   | 0                 | 0.61 $\pm$ 0.56   | 0.31 $\pm$ 0.69          |
| IL-5                              | 8.18 $\pm$ 13     | 3.39 $\pm$ 3.67   | 0.73 $\pm$ 1.51   | 3.79 $\pm$ 1.14          |
| IL-6                              | 1674 $\pm$ 688    | 924 $\pm$ 619     | 589 $\pm$ 300     | 639 $\pm$ 871            |
| IL-7                              | 1.75 $\pm$ 1.73   | 3.30 $\pm$ 2.98   | 1.27 $\pm$ 1.77   | 1.85 $\pm$ 1.34          |
| IL-9                              | 217 $\pm$ 84      | 209 $\pm$ 208     | 283 $\pm$ 38      | 343 $\pm$ 170            |
| IL-10                             | 13 $\pm$ 14       | 3.02 $\pm$ 1.68   | 11 $\pm$ 4.74     | 3.91 $\pm$ 2.58          |
| IL-12(p40)                        | 0                 | 0                 | 0                 | 0                        |
| IL-12(p70)                        | 58 $\pm$ 22       | 39 $\pm$ 15.00    | 25 $\pm$ 24       | 36 $\pm$ 29              |
| IL-13                             | 43 $\pm$ 29       | 14 $\pm$ 14       | 8.63 $\pm$ 11     | 15 $\pm$ 14              |
| IL-15                             | 29 $\pm$ 30       | 15 $\pm$ 14       | 6.54 $\pm$ 9.25   | 43 $\pm$ 46              |
| IL-17                             | 5.93 $\pm$ 4.44   | 1.12 $\pm$ 2.50   | 4.49 $\pm$ 3.05   | 1.39 $\pm$ 0.99          |
| IP-10                             | 513 $\pm$ 338     | 211 $\pm$ 111     | 294 $\pm$ 85      | 122 $\pm$ 76*            |
| Eotaxin                           | 422 $\pm$ 145     | 419 $\pm$ 109     | 424 $\pm$ 108     | 399 $\pm$ 104            |
| KC                                | 812 $\pm$ 396     | 654 $\pm$ 411     | 610 $\pm$ 427     | 249 $\pm$ 293            |
| LIF                               | 0.25 $\pm$ 0.57   | 0                 | 1.96 $\pm$ 1.89   | 2.44 $\pm$ 5.46          |
| LIX                               | 2187 $\pm$ 1269   | 2512 $\pm$ 1393   | 3544 $\pm$ 733    | 1981 $\pm$ 701           |
| MCP-1                             | 156 $\pm$ 43      | 140 $\pm$ 70      | 132 $\pm$ 22      | 75 $\pm$ 59              |
| MIG                               | 1726 $\pm$ 1250   | 1278 $\pm$ 291    | 974 $\pm$ 599     | 1065 $\pm$ 685           |
| MIP1- $\alpha$                    | 68 $\pm$ 29       | 70 $\pm$ 55       | 42 $\pm$ 45       | 54 $\pm$ 49              |
| MIP1- $\beta$                     | 32 $\pm$ 32       | 14 $\pm$ 18       | 22 $\pm$ 33       | 12 $\pm$ 17              |
| MIP-2                             | 33 $\pm$ 22       | 13 $\pm$ 18       | 33 $\pm$ 20       | 10 $\pm$ 15              |
| RANTES                            | 14 $\pm$ 10       | 3.89 $\pm$ 3.04   | 5.14 $\pm$ 2.89   | 5.71 $\pm$ 6.37          |
| VEGF                              | 2.52 $\pm$ 2.72   | 1.34 $\pm$ 2.94   | 3.05 $\pm$ 1.68   | 1.08 $\pm$ 1.33          |

Table S2 Continued

| Cytokine/<br>Chemokine<br>(pg/mL) | Serum       |              |               |                          |
|-----------------------------------|-------------|--------------|---------------|--------------------------|
|                                   | 96 h        |              |               |                          |
|                                   | WT          | $\Delta lpp$ | $\Delta msbB$ | $\Delta lpp/\Delta msbB$ |
| TNF- $\alpha$                     | 6.31±3.52   | 4.02±2.52    | 0.83±1.85     | 3.13±5.42                |
| IFN- $\gamma$                     | 27±59       | 0            | 0             | 2.45±4.90                |
| G-CSF                             | 45170±37057 | 32490±36362  | 2797±2238     | 54531±35309              |
| GM-CSF                            | 11±19       | 32±43        | 2.27±5.07     | 11±22                    |
| M-CSF                             | 2.70±6.03   | 2.56±5.72    | 0             | 1.39±2.77                |
| IL-1 $\alpha$                     | 35±17       | 63±73        | 11±8.53       | 26±19                    |
| IL-1 $\beta$                      | 18±12       | 18±13        | 12±18         | 19±12                    |
| IL-2                              | 2.98±0.87   | 2.09±0.97    | 1.33±0.79     | 2.36±1.97                |
| IL-3                              | 3.04±1.43   | 1.22±0.88    | 1.65±1.46     | 2.51±2.82                |
| IL-4                              | 0           | 0.03±0.07    | 0             | 1.93±3.85                |
| IL-5                              | 10±6.79     | 5.84±6.61    | 3.67±4.55     | 1.21±1.47                |
| IL-6                              | 1564±1108   | 408±332      | 600±664       | 739±1022                 |
| IL-7                              | 3.68±3.26   | 4.35±1.35    | 3.47±1.76     | 3.55±4.72                |
| IL-9                              | 337±33      | 265±245      | 171±200       | 152±152                  |
| IL-10                             | 8.05±3.84   | 9.35±6.60    | 15±26         | 14±17                    |
| IL-12(p40)                        | 0           | 0            | 0             | 1.43±2.85                |
| IL-12(p70)                        | 54±18       | 36±34        | 37±27         | 45±32                    |
| IL-13                             | 29±21       | 22±18        | 5.98±6.52     | 13±18                    |
| IL-15                             | 23±14       | 18±6.36      | 11±4.04       | 30±35                    |
| IL-17                             | 5.83±3.28   | 7.43±6.56    | 1.48±3.32     | 7.90±3.78                |
| IP-10                             | 270±120     | 144±88       | 115±58        | 76±77                    |
| Eotaxin                           | 401±142     | 428±168      | 220±65        | 293±196                  |
| KC                                | 342±250     | 332±179      | 360±313       | 267±456                  |
| LIF                               | 0           | 1.06±1.31    | 0             | 0                        |
| LIX                               | 2882±1727   | 1720±2375    | 1862±1755     | 2073±2190                |
| MCP-1                             | 135±93      | 100±36       | 74±52         | 175±145                  |
| MIG                               | 1608±1323   | 567±216      | 435±345       | 470±298                  |
| MIP1- $\alpha$                    | 77±38       | 92±29        | 31±34         | 97±65                    |
| MIP1- $\beta$                     | 24±15       | 17±28        | 7.96±13       | 22±19                    |
| MIP-2                             | 11±17       | 14±21        | 4.42±9.88     | 18±20                    |
| RANTES                            | 8.93±8.70   | 2.74±5.13    | 7.66±14       | 4.36±5.99                |
| VEGF                              | 1.13±1.27   | 0.31±0.41    | 3.91±7.78     | 0.85±1.05                |

Table S2 Continued

| Cytokine/<br>Chemokine<br>(pg/mL) | Serum           |                 |                 |                          |
|-----------------------------------|-----------------|-----------------|-----------------|--------------------------|
|                                   | 144 h           |                 |                 |                          |
|                                   | WT              | $\Delta lpp$    | $\Delta msbB$   | $\Delta lpp/\Delta msbB$ |
| TNF- $\alpha$                     | 0               | 0.34 $\pm$ 0.68 | 14 $\pm$ 20     | 0.90 $\pm$ 2.02          |
| IFN- $\gamma$                     | 0               | 0               | 0               | 0                        |
| G-CSF                             | 1889 $\pm$ 556  | 443 $\pm$ 305   | 425 $\pm$ 523   | 579 $\pm$ 446            |
| GM-CSF                            | 19 $\pm$ 27     | 4.79 $\pm$ 11   | 3.85 $\pm$ 7.70 | 12 $\pm$ 17              |
| M-CSF                             | 0               | 0               | 1.14 $\pm$ 2.28 | 1.34 $\pm$ 3.00          |
| IL-1 $\alpha$                     | 9.83 $\pm$ 12   | 9.71 $\pm$ 5.66 | 12 $\pm$ 6.29   | 5.72 $\pm$ 5.18          |
| IL-1 $\beta$                      | 17 $\pm$ 8.81   | 3.92 $\pm$ 6.80 | 9.34 $\pm$ 7.80 | 9.55 $\pm$ 7.19          |
| IL-2                              | 1.65 $\pm$ 0.57 | 1.01 $\pm$ 0.60 | 0.99 $\pm$ 0.90 | 1.33 $\pm$ 0.56          |
| IL-3                              | 0.55 $\pm$ 0.40 | 0.48 $\pm$ 0.36 | 0.86 $\pm$ 0.62 | 0.99 $\pm$ 0.65          |
| IL-4                              | 0               | 0.29 $\pm$ 0.65 | 0.63 $\pm$ 0.73 | 0.25 $\pm$ 0.55          |
| IL-5                              | 4.68 $\pm$ 0    | 2.69 $\pm$ 1.76 | 6.22 $\pm$ 11   | 3.11 $\pm$ 3.18          |
| IL-6                              | 91 $\pm$ 110    | 89 $\pm$ 107    | 413 $\pm$ 469   | 84 $\pm$ 85              |
| IL-7                              | 2.37 $\pm$ 2.25 | 2.75 $\pm$ 5.16 | 0.85 $\pm$ 1.69 | 0.50 $\pm$ 0.49          |
| IL-9                              | 228 $\pm$ 2.98  | 29 $\pm$ 45     | 256 $\pm$ 229   | 200 $\pm$ 287            |
| IL-10                             | 4.81 $\pm$ 3.09 | 4.55 $\pm$ 3.53 | 8.28 $\pm$ 4.62 | 3.36 $\pm$ 3.49          |
| IL-12(p40)                        | 0               | 0               | 0.64 $\pm$ 1.28 | 0                        |
| IL-12(p70)                        | 27 $\pm$ 1.57   | 7.20 $\pm$ 16   | 39 $\pm$ 39     | 12 $\pm$ 21              |
| IL-13                             | 4.46 $\pm$ 2.47 | 0.50 $\pm$ 1.11 | 5.44 $\pm$ 4.80 | 5.32 $\pm$ 8.02          |
| IL-15                             | 13 $\pm$ 12     | 5.55 $\pm$ 8.17 | 6.96 $\pm$ 14   | 8.51 $\pm$ 8.91          |
| IL-17                             | 2.06 $\pm$ 2.08 | 1.90 $\pm$ 1.37 | 5.68 $\pm$ 5.05 | 1.30 $\pm$ 2.76          |
| IP-10                             | 515 $\pm$ 640   | 131 $\pm$ 24    | 189 $\pm$ 73    | 135 $\pm$ 60             |
| Eotaxin                           | 342 $\pm$ 72    | 375 $\pm$ 53    | 270 $\pm$ 34    | 301 $\pm$ 189            |
| KC                                | 68 $\pm$ 58     | 13 $\pm$ 8.77   | 61 $\pm$ 83     | 13 $\pm$ 4.96            |
| LIF                               | 0               | 0               | 4.71 $\pm$ 5.55 | 0.71 $\pm$ 1.59          |
| LIX                               | 1558 $\pm$ 1516 | 1209 $\pm$ 1584 | 1806 $\pm$ 469  | 1319 $\pm$ 586           |
| MCP-1                             | 73 $\pm$ 20     | 17 $\pm$ 14     | 131 $\pm$ 71    | 30 $\pm$ 23              |
| MIG                               | 1042 $\pm$ 629  | 242 $\pm$ 156   | 1673 $\pm$ 2620 | 392 $\pm$ 314            |
| MIP1- $\alpha$                    | 214 $\pm$ 172   | 12 $\pm$ 18*    | 150 $\pm$ 133   | 20 $\pm$ 33*             |
| MIP1- $\beta$                     | 42 $\pm$ 0.68   | 3.44 $\pm$ 5.05 | 73 $\pm$ 86     | 1.28 $\pm$ 2.85          |
| MIP-2                             | 36 $\pm$ 50     | 23 $\pm$ 25     | 12 $\pm$ 15     | 27 $\pm$ 19              |
| RANTES                            | 0               | 6.66 $\pm$ 6.93 | 5.26 $\pm$ 3.26 | 3.51 $\pm$ 4.25          |
| VEGF                              | 2.66 $\pm$ 3.75 | 0.27 $\pm$ 0.59 | 1.42 $\pm$ 1.52 | 1.01 $\pm$ 1.60          |

Table S2 Continued

| Cytokine/<br>Chemokine<br>(pg/mL) | Spleen          |                 |                  |                   |
|-----------------------------------|-----------------|-----------------|------------------|-------------------|
|                                   | 96 h            |                 |                  |                   |
|                                   | WT              | <i>Δlpp</i>     | <i>ΔmsbB</i>     | <i>Δlpp/ΔmsbB</i> |
| TNF- $\alpha$                     | 76 $\pm$ 23     | 67 $\pm$ 21     | 67 $\pm$ 33      | 42 $\pm$ 15       |
| IFN- $\gamma$                     | 443 $\pm$ 368   | 87 $\pm$ 46*    | 45 $\pm$ 25*     | 46 $\pm$ 9.58*    |
| G-CSF                             | 1333 $\pm$ 325  | 820 $\pm$ 185   | 627 $\pm$ 325*   | 621 $\pm$ 334*    |
| GM-CSF                            | 147 $\pm$ 33    | 105 $\pm$ 6.36  | 113 $\pm$ 45     | 90 $\pm$ 23       |
| M-CSF                             | 437 $\pm$ 316   | 342 $\pm$ 124   | 221 $\pm$ 88     | 256 $\pm$ 74      |
| IL-1 $\alpha$                     | 326 $\pm$ 133   | 192 $\pm$ 57    | 191 $\pm$ 55     | 154 $\pm$ 32      |
| IL-1 $\beta$                      | 543 $\pm$ 429   | 256 $\pm$ 30    | 455 $\pm$ 465    | 194 $\pm$ 36      |
| IL-2                              | 37 $\pm$ 3.80   | 39 $\pm$ 6.30   | 25 $\pm$ 9.28    | 33 $\pm$ 5.52     |
| IL-3                              | 170 $\pm$ 89    | 127 $\pm$ 68    | 116 $\pm$ 57     | 70 $\pm$ 30       |
| IL-4                              | 14 $\pm$ 5.45   | 8.56 $\pm$ 8.12 | 5.20 $\pm$ 4.17  | 6.96 $\pm$ 11     |
| IL-5                              | 51 $\pm$ 6.58   | 38 $\pm$ 10     | 36 $\pm$ 13      | 28 $\pm$ 21       |
| IL-6                              | 944 $\pm$ 573   | 331 $\pm$ 113*  | 271 $\pm$ 132*   | 205 $\pm$ 57*     |
| IL-7                              | 23 $\pm$ 3      | 19 $\pm$ 17     | 15 $\pm$ 14      | 8.15 $\pm$ 8.02   |
| IL-9                              | 108 $\pm$ 29    | 82 $\pm$ 39     | 63 $\pm$ 58      | 63 $\pm$ 43       |
| IL-10                             | 176 $\pm$ 92    | 142 $\pm$ 61    | 142 $\pm$ 62     | 83 $\pm$ 38       |
| IL-12(p40)                        | 99 $\pm$ 58     | 61 $\pm$ 29     | 75 $\pm$ 55      | 51 $\pm$ 33       |
| IL-12(p70)                        | 19 $\pm$ 5      | 6.82 $\pm$ 10   | 13 $\pm$ 7.02    | 1.43 $\pm$ 3.20*  |
| IL-13                             | 166 $\pm$ 32    | 119 $\pm$ 27    | 131 $\pm$ 78     | 101 $\pm$ 59      |
| IL-15                             | 46 $\pm$ 17     | 24 $\pm$ 17     | 39 $\pm$ 37      | 19 $\pm$ 26       |
| IL-17                             | 53 $\pm$ 25     | 35 $\pm$ 38     | 52 $\pm$ 36      | 15 $\pm$ 21       |
| IP-10                             | 1839 $\pm$ 545  | 1120 $\pm$ 320  | 734 $\pm$ 431*   | 1056 $\pm$ 336    |
| Eotaxin                           | 956 $\pm$ 166   | 685 $\pm$ 262   | 276 $\pm$ 338*   | 543 $\pm$ 141     |
| KC                                | 1719 $\pm$ 362  | 1410 $\pm$ 317  | 964 $\pm$ 639    | 999 $\pm$ 534     |
| LIF                               | 41 $\pm$ 42     | 17 $\pm$ 13     | 1.65 $\pm$ 3     | 5.69 $\pm$ 12     |
| LIX                               | 719 $\pm$ 150   | 781 $\pm$ 345   | 644 $\pm$ 301    | 450 $\pm$ 153     |
| MCP-1                             | 227 $\pm$ 112   | 179 $\pm$ 81    | 146 $\pm$ 91     | 94 $\pm$ 46       |
| MIG                               | 8963 $\pm$ 1500 | 6270 $\pm$ 1621 | 4726 $\pm$ 3209* | 6511 $\pm$ 1406   |
| MIP1- $\alpha$                    | 227 $\pm$ 152   | 133 $\pm$ 45    | 126 $\pm$ 33     | 91 $\pm$ 52       |
| MIP1- $\beta$                     | 243 $\pm$ 72    | 227 $\pm$ 56    | 146 $\pm$ 61     | 170 $\pm$ 39      |
| MIP-2                             | 113 $\pm$ 48    | 73 $\pm$ 10     | 81 $\pm$ 22      | 66 $\pm$ 14       |
| RANTES                            | 468 $\pm$ 34    | 533 $\pm$ 197   | 326 $\pm$ 186    | 491 $\pm$ 158     |
| VEGF                              | 265 $\pm$ 54    | 291 $\pm$ 181   | 186 $\pm$ 122    | 273 $\pm$ 103     |

\* Denotes statistical significant differences compared to the WT bacteria-infected group by using one-way ANOVA with Bonferroni Correction.



**Table S3: Cytokine/chemokine production from T cells isolated from *Y. pestis* infected mice and re-stimulated with heat killed WT *Y. pestis* CO92**

| Cytokine/<br>Chemokine | Day 14     |                                     | Day 21     |                                     | Day 60     |                                     |
|------------------------|------------|-------------------------------------|------------|-------------------------------------|------------|-------------------------------------|
|                        | WT (pg/mL) | $\Delta lpp/\Delta msbB$<br>(pg/mL) | WT (pg/mL) | $\Delta lpp/\Delta msbB$<br>(pg/mL) | WT (pg/mL) | $\Delta lpp/\Delta msbB$<br>(pg/mL) |
| TNF- $\alpha$          | 1912±161   | 2057±246                            | 7539±924   | 8783±1750                           | 3401±1371  | 2068±218                            |
| IFN- $\gamma$          | 2202±270   | 2327±217                            | 2456±406   | 2860±618                            | 550±257    | 544±261                             |
| G-CSF                  | 1661±394   | 2179±1000                           | 2193±89    | 2280±116                            | 1376±449   | 1100±56                             |
| GM-CSF                 | 110±88     | 106±49                              | 210±138    | 342±245                             | 63±33      | 47±30                               |
| M-CSF                  | 1700±202   | 1849±283                            | 3230±359   | 3244±553                            | 1832±824   | 1636±333                            |
| IL-2                   | 2005±259   | 2107±322                            | 4761±582   | 4988±816                            | 1963±683   | 1710±125                            |
| IL-3                   | 229±10     | 228±109                             | 536±148    | 595±282                             | 158±117    | 147±17                              |
| IL-4                   | 151±101    | 97±48                               | 1091±682   | 1399±1025                           | 114±154    | 71±62                               |
| IL-5                   | 2764±260   | 2803±224                            | 3245±430   | 3793±595                            | 1282±347   | 1141±211                            |
| IL-6                   | 36±27      | 26±34                               | 69±60      | 114±165                             | 5.98±12    | 4.99±9.27                           |
| IL-7                   | 732±413    | 913±47                              | 1061±108   | 1073±110                            | 718±118    | 775±107                             |
| IL-9                   | 2046±116   | 2140±186                            | 2636±260   | 2766±350                            | 588±559    | 652±134                             |
| IL-10                  | 0          | 0                                   | 614±562    | 946±587                             | 3.96±5.66  | 0.60±1.35                           |
| IL-13                  | 611±355    | 706±144                             | 933±125    | 1065±202                            | 306±280    | 281±255                             |
| IL-15                  | 1185±187   | 1214±158                            | 1395±240   | 1569±311                            | 773±404    | 878±22                              |
| IL-17                  | 2167±338   | 2309±318                            | 3392±522   | 3788±757                            | 1370±676   | 1072±153                            |
| IP-10                  | 17±14      | 8.43±2.83                           | 15±16      | 35±29                               | 6.48±5.37  | 3.56±1.38                           |
| Eotaxin                | 2813±465   | 2959±258                            | 2662±469   | 3137±551                            | 1017±264   | 897±94                              |
| KC                     | 152±90     | 174±78                              | 1332±517   | 2136±1957                           | 309±490    | 112±61                              |
| LIF                    | 934±510    | 1071±231                            | 861±515    | 1094±653                            | 343±425    | 656±328                             |
| LIX                    | 1467±627   | 1666±750                            | 2141±1232  | 3484±2226                           | 468±326    | 772±401                             |
| MCP-1                  | 1158±207   | 1207±90                             | 1941±409   | 2441±903                            | 1287±418   | 1107±91                             |
| MIG                    | 1489±123   | 1530±80                             | 2754±544   | 2941±500                            | 6822±3864  | 4982±2570                           |
| MIP1- $\alpha$         | 4962±471   | 5296±620                            | 8116±2809  | 9785±3252                           | 5005±2458  | 6023±3240                           |
| MIP1- $\beta$          | 1062±49    | 1073±31                             | 1113±43    | 1158±35                             | 1659±186   | 1516±144                            |
| MIP-2                  | 1345±253   | 1489±308                            | 1874±420   | 2354±685                            | 750±378    | 617±72                              |
| RANTES                 | 747±289    | 801±317                             | 1452±1412  | 2565±1681                           | 59±29      | 73±15                               |
| VEGF                   | 1912±161   | 2057±246                            | 7539±924   | 8783±1750                           | 3401±1371  | 2068±218                            |
